# Supplementary material for: Climate-smart urbanization could reduce carbon and nitrogen emission in China
Source: Research Square preprint supplement (doi:10.21203/rs.3.rs-6043571/v1), 2025-02-27
Supplement: Supplementary file 1 [file d487bb9070e54c8ca3bffbf0.docx]

**Supplementary Information for：**

**Climate-smart urbanization could reduce carbon and nitrogen emission in China**

Table of Contents

[Supplementary Methods 3](#_Toc190447821)

[Supplementary Figures 7](#_Toc190447827)

[Fig. S1 | SEM of GDP impacts on residential electricity consumption intensity. 7](#_Toc190447828)

[Fig. S2 | City-level spatial characteristics of GHG and NOx emissions per capita from residential electricity consumption in 2020 and 2050. 8](#_Toc190447829)

[Fig. S3 | Inter-provincial net population migration flow of China from 2015 to 2020. The number represents the number of people, k means 1,000 capita. 9](#_Toc190447830)

[Fig. S4 | Forecast of the proportion of residential electricity consumption in total social electricity consumption in 2050 using ARIMA model. 10](#_Toc190447831)

[Supplementary Tables 11](#_Toc190447832)

[Table S1 Future scenario description 11](#_Toc190447833)

[Table S2 Historical changes in key indicators related to residential electricity consumption in China 12](#_Toc190447834)

[Table S3 Description of key conclusions under future scenarios and their differences from 2020 15](#_Toc190447835)

[Table S4 Summary statistics for main variables used in regression analysis 18](#_Toc190447836)

[Table S5 Path Coefficients and *P*-values of the Structural Equation Model (SEM) 19](#_Toc190447837)

[Table S6 Comparison of carbon emission of domestic electricity from multiple sources 20](#_Toc190447838)

[Table S7 Reginal electricity grid GHG and NOx emission factors in 2020 21](#_Toc190447839)

[Table S8 Provincial electricity GHG and NOx emission factors in 2020 22](#_Toc190447840)

[Table S9 Mitigation benefits 23](#_Toc190447841)

[Table S10 Comparison of the projected residential electricity energy mix in this study with GEIDCO and BCG projections. 24](#_Toc190447842)

[Table S11 Full names and abbreviations of China's provinces 25](#_Toc190447843)

[References 26](#_Toc190447844)

Supplementary Methods

**Urban expansion modeling**

We calculated the priority level of urban expansion for each grid across China. We assumed that urban expansion is continuous and will start from the boundary of current built-up areas. We set 10 × 10 grids to calculate the priority level at the center of these grids. Here, priority describes the expansion of urban land outward along the boundaries of existing cities. A higher proportion of urban land within the 10 × 10 grids indicates a more likely chosen grid for expansion. We set the value of urban land to 1 and all the other uses of land to 0 on the 2020 land use map and analyzed the potential distribution of new urban lands using the Focal Statistics tool in ArcGIS Pro 2.5. We counted the number of these two land types within the 100 grids and calculated the priority level for the central grid using equation

(1)

Where *Ui* refers to the number of urban grids in the surrounding 100 by 100 grids centred on the *i*th grid. We ranked the *UKi* for all grids in descending order, and eliminate grids that are objectively unlikely to develop into cities (including current urban areas and water). If multiple girds have equal *UK*i, they are ranked according to GDP from largest to smallest, and by default regions with higher GDP are more likely to develop into cities. Based on the following linear plan, urban expansion grids are filtered out.

(2)

Where *j* is the serial number ranked by and GDP, and is the urban population in the *j*th grid, is the national urban population in 2050 as projected by SSP1 from Scientific Data Bank.

**Rural land reclamation modeling**

In the simulation of rural built-up area reclamation, we mainly considered whether there was a large amount of cropland around the homestead; otherwise, it would not be reclaimed or it would instead be returned to natural, unmanaged land, which is common in the southern mountainous areas. For instance, restoration of forest vegetation to abandoned rural homesteads in some islands in East China has occurred. Similar to urban expansion, we estimated the degree of rural land reclaimed by calculating the priority level for all of the grids across China. As continuous croplands are best suited for large-scale farming, we gave high priority to rural lands surrounded by croplands. We set 3 × 3 grids to calculate the priority level of reclaiming rural land at the center of these grids. We set the values of cropland and rural land to 1 and 10, respectively, on the 2015 land use map and analyzed the potential distribution of new croplands using the Focal Statistics tool in ArcGIS version 10.6. We counted the number of the two land use types in the nine grids and calculated the priority level for the central grid using equation：

(3)

Where *Ci* and *Ri* denote the number of grids of cropland and rural land in 3 × 3 grids, respectively. We ranked all the rural grids in descending order of *RKi* and eliminated the grids which were unsuitable for reclamation (slope > 25 degrees or elevation > 3000 m). Finally, based on the following linear programming, reclamation grids in 2050 were filtered out.

(4)

Where j is the raster number ranked by *RPi*, and *RPj*is the rural population in the *j*th grid, *RP2050* is the national rural population in 2050 as projected by SSP1 from Scientific Data Bank.

**Focal Statistics**

The focal statistics tool performs neighborhood operations to calculate the output raster data, where the value of each output pixel is a function of all input pixel values within its specified neighborhood range. By applying this function, statistical data such as the maximum, average, or sum of all values within the neighborhood can be derived. Conceptually, this algorithm works by accessing each pixel in the raster and calculating the specified statistical data based on the identified neighborhood range. The pixel for which the statistical data is being calculated is referred to as the "focal pixel". The value of the focal pixel and all the pixel values in the identified neighborhood are included in the calculation of the neighborhood statistics. In this study, we use the sum statistic in the focal statistics tool, and its expression is as follows:

(5)

Where is the sum of the focal pixel, *N* is the number of pixels in the neighborhood, and is the input pixel value.

**Urbanization process simulation under different scenarios**

**LECI Scenario:** In the selection of urban expansion points, the choice of expansion points is influenced by both the grid code value and the residential electricity consumption intensity. The lower the residential electricity consumption intensity and the higher the grid code value, the higher the priority for urban expansion at that point. Then select all urban expansion points based on this principle.For the selection of rural reclamation points, the influence of rural residential electricity consumption intensity is considered. When the reclamation value of a point is higher and the rural residential electricity consumption intensity is higher, that point is more likely to be reclaimed as arable land, thus being prioritized for reclamation.

**LEF Scenario:** In the selection of urban expansion points, the choice of expansion points is influenced by both the grid code value and the electricity GHG and NOx emission factors. The lower the emission factors and the higher the grid code value, the higher the priority for urban expansion at that point. Then select all urban expansion points based on this principle.For the selection of rural reclamation points, the influence of emission factors on reclamation is considered. When the reclamation value of a point is higher and the emission factor in the rural area is higher, that point is more likely to be reclaimed as arable land, thus being prioritized for reclamation.

**ALL Scenario:** In the selection of urban expansion points, the choice of expansion points is influenced by the grid code value, GDP value, and per capita GHG and NOx emissions. The lower the per capita electricity GHG and NOx emissions, and the higher the grid code and GDP values, the higher the priority for urban expansion at that point. Then select all urban expansion points based on this principle.For the selection of rural reclamation points, the influence of per capita GHG and NOx emissions on reclamation is considered. When the reclamation value of a point is higher and the per capita GHG and NOx emissions in the rural area are higher, that point is more likely to be reclaimed as arable land, thus being prioritized for reclamation.

**The calculation of the GHG and NOx emission factors for electricity**

The direct GHG emissions generated by electricity production in the geographic area covered by regional power grid *i* (*Cgrid,i*) can be calculated by the product of fossil fuel consumption (*FCm*), the average net calorific value (*NCVm*) of the fuel, and the fuel emission factor (*EFm*), as shown in equation (6)

(6)

Where *FCm* represents the consumption of fossil fuel *m* used for electricity generation in the geographic area covered by power grid *i*, in units of 104 t (for solid or liquid fuels) or 108 m3 (for gas fuels); *NCVm* is the average net calorific value of fossil fuel m, in units of MJ/t (for solid or liquid fuels) or MJ/104 m3 (for gas fuels), from China Energy Statistical Yearbook 20211, Statistical system for energy resource consumption in public institutions2 and Yueyang Statistics Bureau3; *EFm* is the GHG emission factor for fossil fuel *m* (the CO2 emission factor is calculated from equation (7)), in units of g CO2eq/MJ; *m* represents the type of fossil fuel consumed for electricity generation. Electricity CO2 emission factors in Russia and Myanmar come from International Renewable Energy Agency (IRENA)4.

When calculating the emissions of different types of greenhouse gases, the fuel emission factor (*EFm*) in equation (6) varies depending on the gas: for CO2 emissions, the local data from China should be used and calculated based on equation (7); for CH4 and N2O, due to a lack of more precise data, emission factors based on fuel calorific value can be directly applied5.

(7)

Where represents the carbon content per unit heat value of fossil fuel *m*, in units of g/MJ, from Guidelines for the preparation of provincial greenhouse gas inventory (Trial)6 and Research on China’s greenhouse gas inventory: 20057; is the carbon oxidation rate of fossil fuel *m*, in percentage (%), from Guidelines for the preparation of provincial greenhouse gas inventory6 and Research on China’s greenhouse gas inventory: 20057; is the conversion factor from carbon to carbon dioxide. The CO2 emissions of heat is 0.11 t CO2/GJ from Accounting methods and reporting guidelines for greenhouse gas emissions of Chinese power generation enterprises (Trial)8. Calculation of CO2eq using the 100-year global warming potential (GWP) values presented in Climate Change 2019: The Sixth Assessment Report of the United Nations Intergovernmental Panel on Climate Change9.

When calculating the net electricity fed into the grid by power plants in this region, the electricity consumption of the power generation company itself should be deducted, as shown in equation (8)

(8)

Where is the net electricity fed into the grid by power plants in *i*th region. represents the annual electricity generation from power plants using *q*th technology type within the geographic area covered by *i*th regional grid 104 kWh. is the average auxiliary power consumption rate (%) for power plants using *q* th technology type within the geographic area covered by *i*th regional grid, from Compilation of Elecricity Industry statistics 202010. The calculation of *Ep,q,* which refers to the annual net electricity fed into the grid from power plants in *p*th province using *q*th technology type, uses the same method as shown in equation (8).

The net electricity exported from *i*th regional grid to *p*th province is calculated using equation (9).

(9)

Where represents the total annual electricity consumption of the entire society in *p*th province (104 kWh). is the total electricity electricityin *p*th province. is the net electricity transmitted from *n*th province to *p*th province, 104 kWh. is the net electricity exported from *k*th country to *p*th province, 104 kWh.

When calculating the *EFNOx*, NOx emissions factor for fossil fuel could be found in *Hao et al*11., other equations are consistent with GHG emission.

**Supplementary** **Figures**


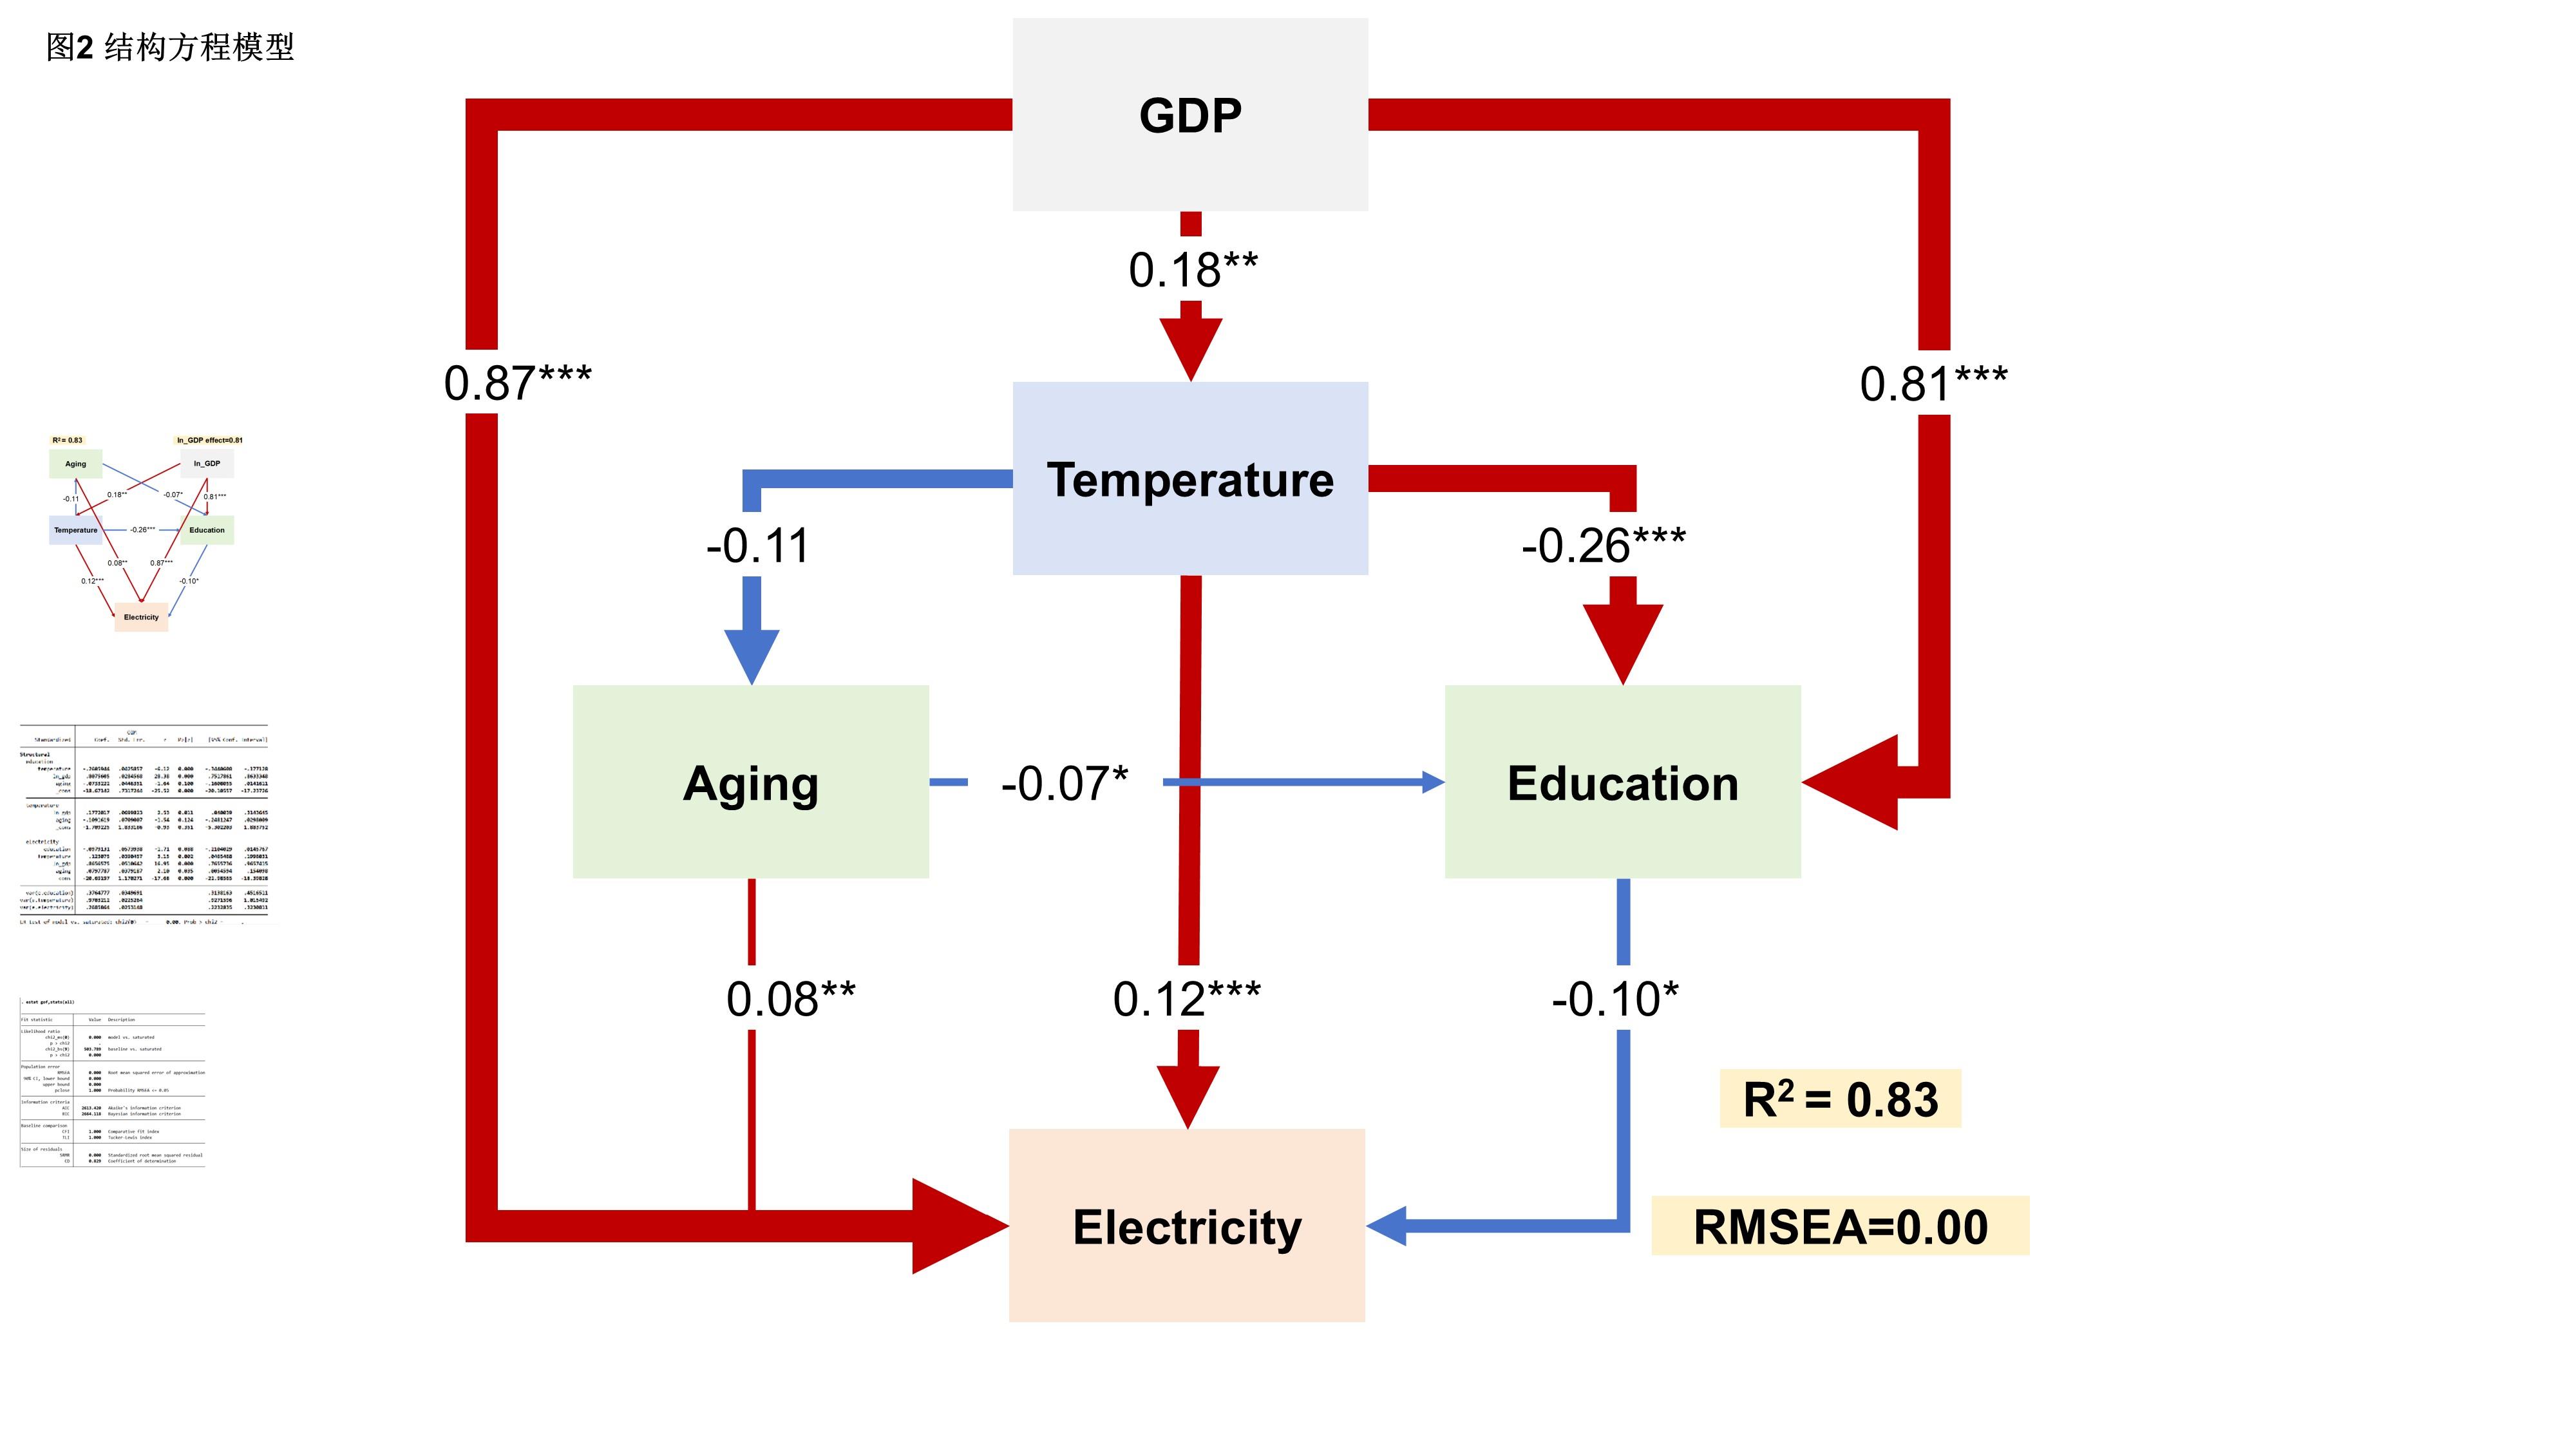


**Fig. S**1 | SEM of GDP impacts on residential electricity consumption intensity.The asterisks indicate the statistical significance level based on *P* values: **P* < 0.1, ***P* < 0.05, ****P* < 0.01. The numbers adjacent to the lines are the standardized path coefficients, indicating the degree of standard deviation changes in dependent variables if each of the independent variables change by one standard deviation. The blue and red lines represent positive and negative effects, respectively. The line width is proportional to the strength of the standardized path coefficient. Exact *P* values are listed in Table S5.


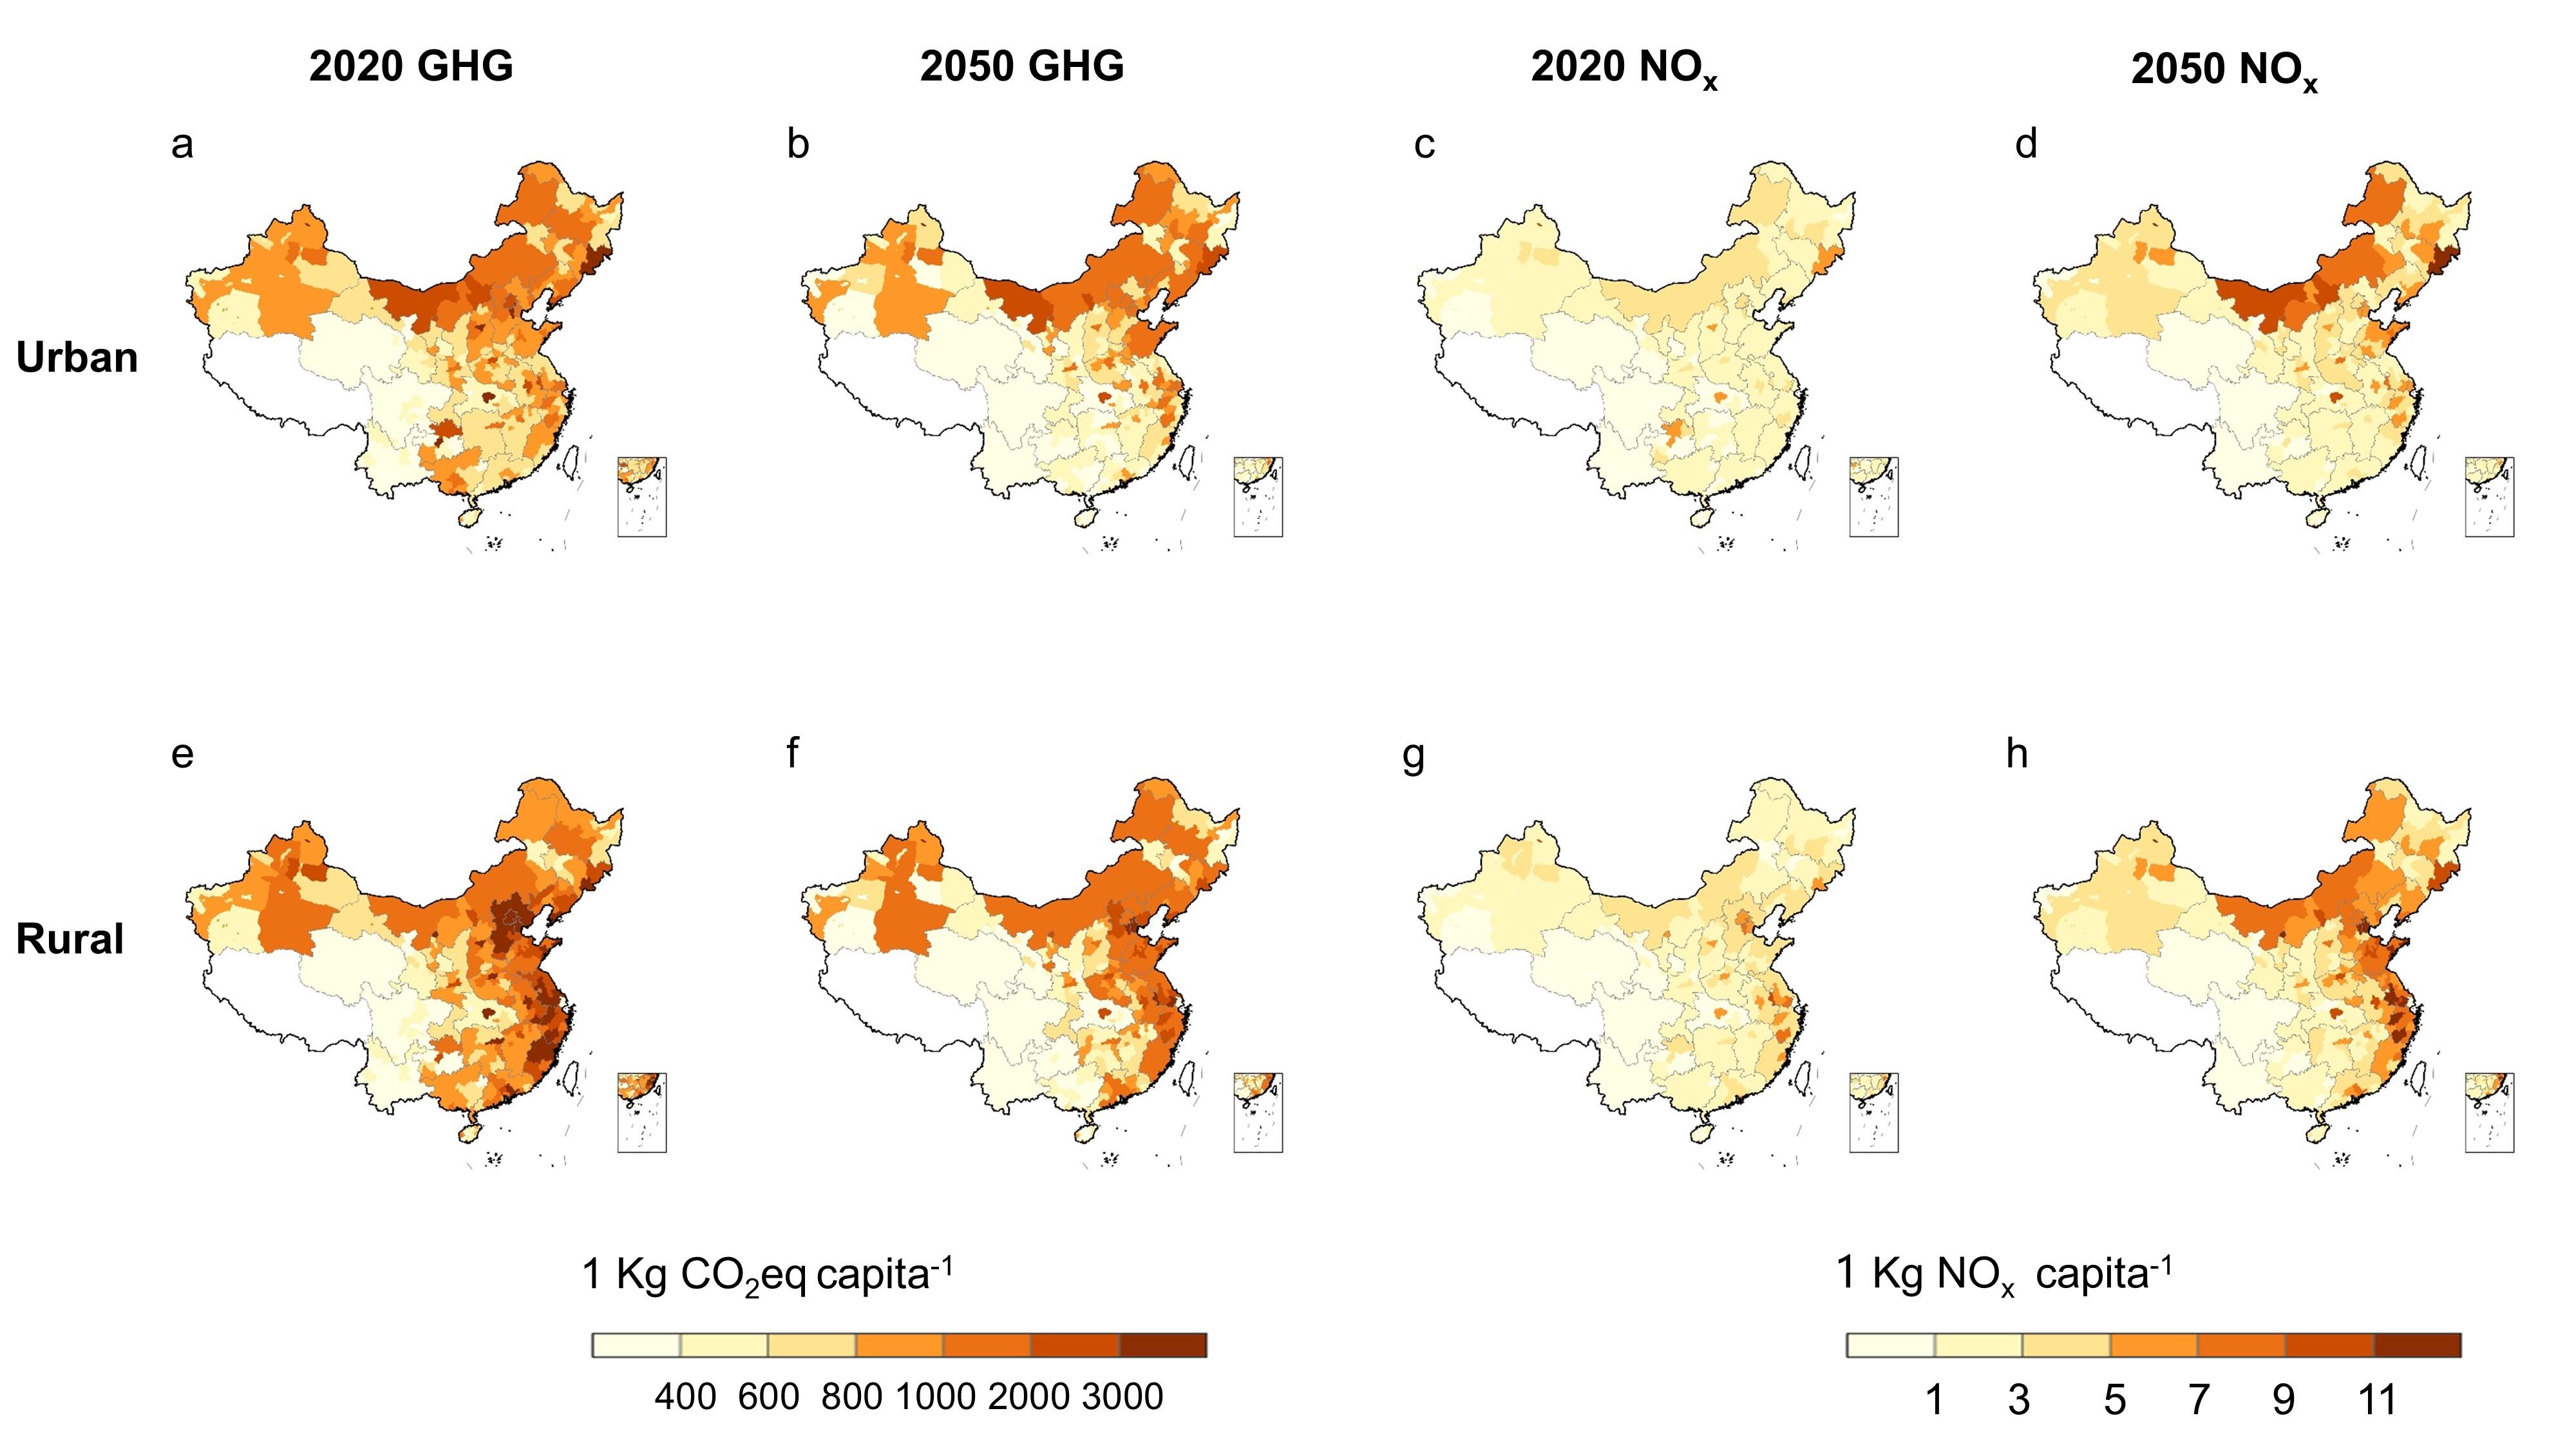


**Fig. S**2 | City-level spatial characteristics of GHG and NOx emissions per capita from residential electricity consumption in 2020 and 2050. The two rows represent urban and rural, respectively. The first two columns represent GHG emissions per capita, and the last two columns represent NOx emissions per capita. **a-d**, Urban spatial characteristics of GHG emissions per capita from residential electricity consumption in 2020 (a), 2050 (b), and NOx emissions per capita from residential electricity consumption in 2020 (c), 2050 (d). **e-h**, Rural spatial characteristics of GHG emissions per capita from residential electricity consumption in 2020 (e), 2050 (f), and NOx emissions per capita from residential electricity consumption in 2020 (g), 2050 (h).


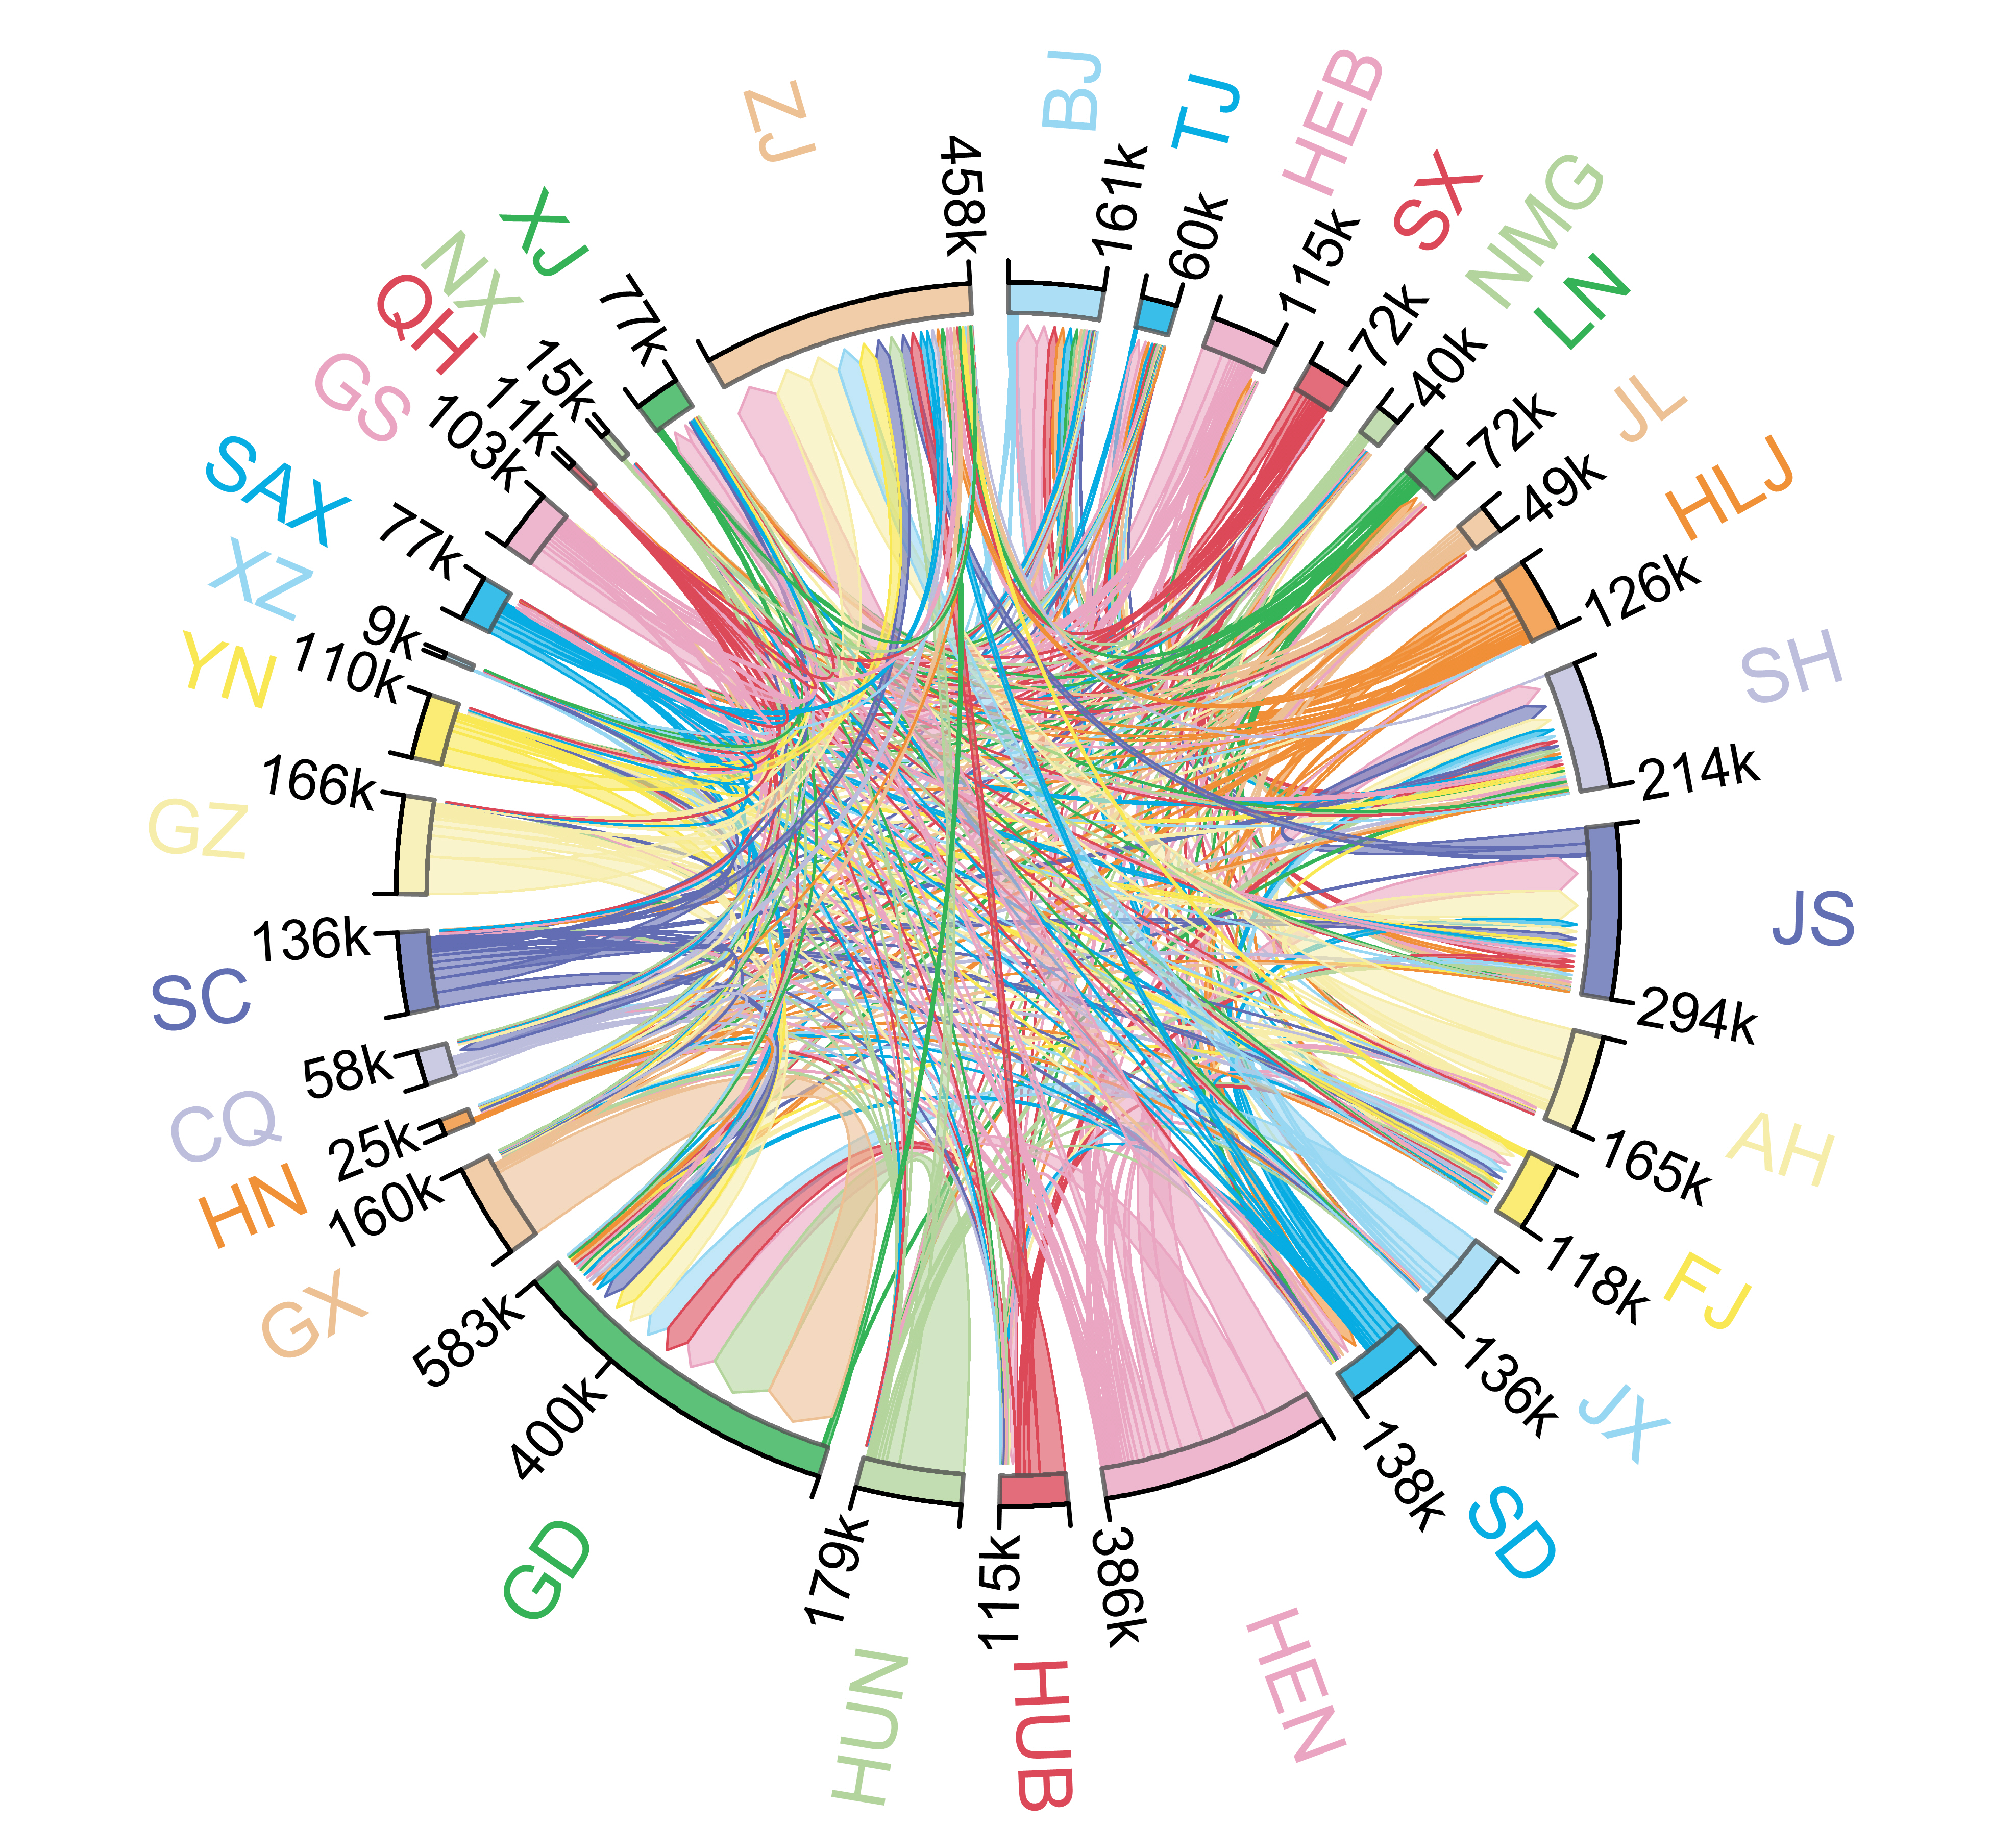


Fig. S3 | Inter-provincial net population migration flow of China from 2015 to 2020. The number represents the number of people, k means 1,000 capita. The capital letters with different colors represent the abbreviations of the 31 provinces of China; for the full names, see Table S11.


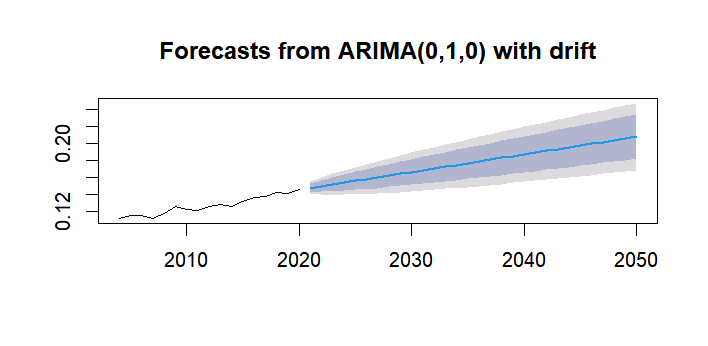


Fig. S4 | Forecast of the proportion of residential electricity consumption in total social electricity consumption in 2050 using ARIMA model. Vertical coordinate numbers indicate the share of residential electricity consumption in the total electricity consumption of the whole society (%), horizontal coordinates indicate the year, and the data start in 2004.

**Supplementary** **Tables**

Table S1 Future scenario description

| **Scenario** | **Scenario assumption** |
| --- | --- |
| BAU  (Business As Usual) | Only consider GDP, following the conclusions of past studies. This scenario assumes that, in the future, population migration will prioritize regions with higher GDP, specifically the coastal urban clusters in eastern China, in accordance with historical urban-rural migration patterns |
| LECI  (Low Electricity Consumption Intensity) | Rural-to-urban migration will prioritize regions with lower residential electricity consumption intensity. Essentially, migration will tend to flow towards areas with slower economic development, lower temperatures, lower levels of aging, but relatively higher education levels |
| LEF  (Low Emission Factor per unit of Electricity Consumption） | Rural-to-urban migration will prioritize regions with lower electricity GHG and NOx emission factors. Essentially, migration will tend to flow towards areas with a higher proportion of renewable energy and lower coal consumption per unit of electricity generation in coal-fired power plants. |
| ALL  (combined optimization of both) | Combining the LECI and LEF scenarios, rural to urban migration will prioritize regions with lower per capita electricity-related greenhouse gas and nitrogen emissions, as well as higher GDP. |

Table S2 Historical changes in key indicators related to residential electricity consumption in China

|  | **Residential electricity consumption**  **(Billion** **kWh)** | | | | **Residential electricity consumption intensity**  **(kWh per capita)** | | | | GHG emissions (Mt) | | | |
| --- | --- | --- | --- | --- | --- | --- | --- | --- | --- | --- | --- | --- |
| **Year** | **Total** | **Urban** | **Rural** | **Change rate relative to 1990 (%)** | **Total** | **Urban** | **Rural** | **Change rate relative to 1990 (%)** | **Total** | **Urban** | **Rural** | **Change rate relative to 1990 (%)** |
| 1990 | 48.08 | 27.22 | 20.86 | 0.00 | 42.57 | 115.51 | 23.33 | 0.00 | 46.25 | 25.87 | 20.38 | 0.00 |
| 1995 | 100.37 | 57.58 | 42.79 | 1.09 | 84.72 | 203.89 | 47.42 | 0.99 | 95.27 | 54.03 | 41.24 | 1.06 |
| 2000 | 166.53 | 99.45 | 67.08 | 2.46 | 131.93 | 213.56 | 84.21 | 2.10 | 156.87 | 93.59 | 63.28 | 2.39 |
| 2005 | 283.18 | 173.19 | 109.99 | 4.89 | 220.19 | 309.10 | 151.55 | 4.17 | 266.56 | 161.91 | 104.65 | 4.76 |
| 2010 | 508.95 | 295.49 | 213.46 | 9.59 | 381.56 | 440.12 | 322.24 | 7.96 | 353.54 | 203.42 | 150.12 | 6.64 |
| 2015 | 732.26 | 414.19 | 318.07 | 14.23 | 530.25 | 523.76 | 538.95 | 11.46 | 685.02 | 388.20 | 296.82 | 13.81 |
| 2020 | 1094.61 | 615.72 | 478.89 | 21.77 | 776.44 | 684.14 | 939.39 | 17.24 | 713.70 | 397.39 | 316.95 | 14.43 |

|  | GHG emissions **per capita (Mt** **per capita)** | | | | **NOx emissions** (103 t) | | | | **NOx emissions per capita** (103 t **per capita**) | | | |
| --- | --- | --- | --- | --- | --- | --- | --- | --- | --- | --- | --- | --- |
| **Year** | **Total** | **Urban** | **Rural** | **Change rate relative to 1990 (%)** | **Total** | **Urban** | **Rural** | **Change rate relative to 1990 (%)** | **Total** | **Urban** | **Rural** | **Change rate relative to 1990 (%)** |
| 1990 | 40.95 | 109.77 | 22.80 | 0.00 | 196.50 | 109.91 | 86.59 | 0.00 | 0.17 | 0.47 | 0.10 | 0.00 |
| 1995 | 80.42 | 191.31 | 45.71 | 0.96 | 404.78 | 229.56 | 175.22 | 1.06 | 0.34 | 0.81 | 0.19 | 0.96 |
| 2000 | 124.28 | 200.98 | 79.44 | 2.04 | 666.49 | 397.63 | 268.86 | 2.39 | 0.53 | 0.85 | 0.34 | 2.04 |
| 2005 | 207.27 | 288.97 | 144.19 | 4.06 | 1132.48 | 687.88 | 444.60 | 4.76 | 0.88 | 1.23 | 0.61 | 4.06 |
| 2010 | 265.05 | 302.99 | 226.62 | 5.47 | 1521.18 | 878.00 | 643.18 | 6.74 | 1.14 | 1.31 | 0.97 | 5.56 |
| 2015 | 496.04 | 490.89 | 502.95 | 11.11 | 2974.55 | 1686.76 | 1287.79 | 14.14 | 2.15 | 2.13 | 2.18 | 11.38 |
| 2020 | 506.25 | 441.55 | 621.73 | 11.36 | 3073.29 | 1720.72 | 1355.61 | 14.64 | 2.18 | 1.91 | 2.66 | 11.53 |

|  | Electricity GHG emission Factors  **(kg CO2eq/kWh)** | | Electricity NOx emission Factors  **(kg** /**kWh)** | | **Coefficient of Variation between urban and rural residential electricity consumption intensity (%)** | **Coefficient of Variation between provincial residential electricity consumption intensity (%)** |
| --- | --- | --- | --- | --- | --- | --- |
| **Year** | **Total** | **Change rate relative to 1990**  **(%)** | **Total** | **Change rate relative to 1990**  **(%)** |  |  |
| 1990 | 9.62 | 0.00 | 0.04 | 0.00 | 94 | 56 |
| 1995 | 9.49 | -0.01 | 0.04 | -0.01 | 88 | 55 |
| 2000 | 9.42 | -0.02 | 0.04 | -0.02 | 61 | 55 |
| 2005 | 9.41 | -0.02 | 0.04 | -0.02 | 48 | 52 |
| 2010 | 6.95 | -0.28 | 0.03 | -0.27 | 22 | 37 |
| 2015 | 9.35 | -0.03 | 0.04 | -0.01 | 2 | 27 |
| 2020 | 6.52 | -0.32 | 0.03 | -0.31 | 22 | 27 |

Table S3 Description of key conclusions under future scenarios and their differences from 2020

|  | **2020** | **Scenario** | | | |
| --- | --- | --- | --- | --- | --- |
|  | **BAU** | **LECI** | **LEF** | **ALL** |
| Population (Billion capita) | 1.41 | 1.35 | 1.35 | 1.35 | 1.35 |
| Urban population (Billion capita) | 0.90 | 1.05 | 1.05 | 1.05 | 1.05 |
| Rural population (Billion capita) | 0.51 | 0.30 | 0.30 | 0.30 | 0.30 |
| Urban area (10,000 ha) | 723.5 | 871.1 | 867.6 | 820.9 | 816.7 |
| Rural area (10,000 ha) | 1451.7 | 813.6 | 672.3 | 465.0 | 554.5 |
| Urban electricity consumption (Billion kWh) | 652.2 | 1291.6 | 1170.5 | 1279.2 | 1188.5 |
| Rural electricity consumption (Billion kWh) | 442.4 | 499.0 | 321.9 | 407.3 | 268.2 |
| Electricity consumption (Billion kWh) | 1094.6 | 1790.7 | 1492.4 | 1686.5 | 1456.7 |
| GHG emission for urban electricity consumption (Mt) | 418.2 | 856.8 | 787.0 | 808.0 | 769.2 |
| GHG emission for rural electricity consumption (Mt) | 296.2 | 317.9 | 195.3 | 215.7 | 144.0 |
| GHG emission for electricity consumption (Mt) | 714.3 | 1174.8 | 982.3 | 1023.6 | 913.2 |
| NOx emission for urban electricity consumption (103t) | 1812.8 | 3709.6 | 3384.3 | 3498.6 | 3329.0 |
| NOx emission for rural electricity consumption (103t) | 1263.6 | 1385.3 | 855.2 | 931.2 | 632.5 |
| NOx emission for electricity consumption (103t) | 3076.4 | 5094.9 | 4239.5 | 4429.8 | 3961.5 |
|  |  |  |  |  |  |
| Urban sprawl area (10,000 ha) |  | 147.6 | 144.1 | 97.4 | 93.2 |
| Rural reclamation area (10,000 ha) |  | 638.1 | 779.4 | 986.7 | 897.3 |
| Demographic change (10,000 capita) |  | -5373.7 | -5743.4 | -5809.5 | -5702.4 |
| Immigration regions (+) |  | Eastern Coastal Region (Yangtze River Delta Economic Zone, Northern Maritime Economic Zone, Pearl River Delta Economic Zone), Middle Reaches of the Yangtze River | Right of the Hu's line | Southern region below the Yangtze River | Central China |
| Emigration regions (-) |  | Middle and Lower Reaches of the Yellow Riverr, South of the Yangtze River Regions | North China | North east, North China | Eastern Coastal Region, North east |
| Urban sprawl leads to changes in GHG emissions (Mt) |  | 149.2 | 79.4 | 100.4 | 61.5 |
| Rural reclamation leads to changes in GHG emissions (Mt) |  | 180.1 | 303.2 | 281.9 | 355.1 |
| Urban sprawl leads to changes in NOx emissions (103t) |  | 648.7 | 323.3 | 437.6 | 268.1 |
| Rural reclamation leads to changes in NOx emissions (103t) |  | 743.2 | 1274.8 | 1195.1 | 1500.9 |
| Changes in GHG emissions by 2050 (Mt) |  | 460.4 | 267.9 | 309.3 | 198.8 |
| Changes in NOx emissions by 2050 (103t) |  | 2018.5 | 1163.1 | 1353.4 | 885.2 |
| The rate of change in GHG emissions |  | 64% | 38% | 43% | 28% |
| The rate of change in NOx emissions |  | 66% | 38% | 44% | 29% |

Table S4 Summary statistics for main variables used in regression analysis

|  | **Residential electricity consumption intensity in China** | | | | |
| --- | --- | --- | --- | --- | --- |
|  | **Obs** | **Mean** | **SD** | **Min** | **Max** |
| **Urbanization** | 217 | 61.27 | 11.79 | 28.87 | 89.30 |
| **Ln GDP** | 217 | 10.97 | 0.41 | 10.16 | 12.14 |
| **Education** | 217 | 0.18 | 0.81 | 0.08 | 0.55 |
| **Aging** | 217 | 0.12 | 0.03 | 0.05 | 0.19 |
| **Temperature** | 217 | 14.94 | 5.70 | 3.01 | 25.84 |

Note: Urbanization is the proportion of urban population to the total population. Ln GDP is the logarithm of Gross Domestic Product per capita. Education is the proportion of the population with higher education relative to the total educated population. Aging is the proportion of population over 65 years of age divided by the total population. Temperature is average temperature by province.

Table S5 Path Coefficients and *P*-values of the Structural Equation Model (SEM)

| **Dependent variable** | **Independent variable** | **Path coefficient** | ***P*-values** |
| --- | --- | --- | --- |
| **Education** | Temperature | -0.26*** | (0.000) |
| Ln GDP | 0.81*** | (0.000) |
| Aging | -0.07 | (0.100) |
| **Temperature** | Ln GDP | 0.18*** | (0.000) |
| Aging | -0.11*** | (0.000) |
| **Electricity** | Education | -0.10** | (0.005) |
| Temperature | 0.12* | (0.017) |
| Ln GDP | 0.87*** | (0.000) |
| Aging | 0.08* | (0.024) |

Table S6 Comparison of carbon emission of domestic electricity from multiple sources

| **Data set** | **GHG emissions in 2020 (Mt)** | **Research Methods** | **Time frames are covered** |
| --- | --- | --- | --- |
| *This study 2020 scenario* | 714 |  | 2020-2050 |
| *Chen et al., Energies. 2016*12 | 475.65 | SD Model | 2015-2020 |
| *Xing et al., Environmental Research Letters, 2021*13 | 697.43 | AIM/Enduse model | 2010-2050 |
| *Zhang et al.,* *Applied Energy, 2023*14 | 836.84 | Decomposing  structural decomposition (DSD) | 2000-2020 |

Table S7 Reginal electricity grid GHG and NOx emission factors in 2020

| **EF (kg kWh-1)** | | **2020** | |
| --- | --- | --- | --- |
| **Reginal power grids** | **Including provinces** | **GHG** | **NOx** |
| North China power grid | BJ, TJ, HEB, SX, SD, NMG | 0.9531 | 0.0040 |
| Northeast China Power Grid | LN, JL, HLJ | 0.9194 | 0.0039 |
| East China Power Grid | SH, JS, ZJ, AH, FJ | 0.6857 | 0.0030 |
| Central China Power Grid | HEN, HUB, HUN, JX, SC, CQ | 0.4712 | 0.0020 |
| Southern Power Grid | GD, GX, YN, GZ, HN | 0.4569 | 0.0020 |
| Northwest Power Grid | SAX, GS, QH, NX, XJ | 0.6837 | 0.0033 |

Table S8 Provincial electricity GHG and NOx emission factors in 2020

|  | **EF (kg kWh-1)** | |
| --- | --- | --- |
| **Province** | **GHG** | **NOx** |
| Beijing | 0.7328 | 0.0029 |
| Tianjin | 0.9165 | 0.0036 |
| Hebei | 1.1721 | 0.0037 |
| Shanxi | 0.9661 | 0.0046 |
| Inner Mongolia | 1.0622 | 0.0051 |
| Liaoning | 0.9281 | 0.0038 |
| Jilin | 0.9321 | 0.0044 |
| Heilongjiang | 0.9443 | 0.0043 |
| Shanghai | 0.5957 | 0.0025 |
| Jiangsu | 0.7527 | 0.0032 |
| Zhejiang | 0.5755 | 0.0027 |
| Anhui | 0.8576 | 0.0038 |
| Fujian | 0.5397 | 0.0024 |
| Jiangxi | 0.6970 | 0.0029 |
| Shandong | 0.8331 | 0.0037 |
| Henan | 0.7996 | 0.0037 |
| Hubei | 0.3512 | 0.0015 |
| Hunan | 0.5192 | 0.0021 |
| Guangdong | 0.4962 | 0.0022 |
| Guangxi | 0.5762 | 0.0022 |
| Hainan | 0.5300 | 0.0024 |
| Chongqing | 0.4922 | 0.0020 |
| Sichuan | 0.1460 | 0.0005 |
| Guizhou | 0.5041 | 0.0030 |
| Yunnan | 0.1665 | 0.0006 |
| Tibet | - | - |
| Shannxi | 0.7339 | 0.0033 |
| Gansu | 0.4666 | 0.0022 |
| Qinghai | 0.1018 | 0.0005 |
| Ningxia | 0.8549 | 0.0042 |

Table S9 Mitigation benefits

|  | Unit benefit (US$ kg N-1) | | |  |  | Benefit (US$ billion) | | | | | | | | |
| --- | --- | --- | --- | --- | --- | --- | --- | --- | --- | --- | --- | --- | --- | --- |
|  | Human health | Ecosystem | Climate damage |  |  | Human health | | | Ecosystem | | | Climate damage | | |
| NOx | 18.7 | 8.1 | -3.6 |  |  | LECI-BAU | LEF-BAU | ALL-BAU | LECI-BAU | LEF-BAU | ALL-BAU | LECI-BAU | LEF-BAU | ALL-BAU |
| GHG | - | - | 9000 |  | NOx | 16.00 | 12.44 | 21.19 | 6.93 | 5.39 | 9.18 | -3.09 | -2.40 | -4.09 |
|  |  |  |  |  | GHG | - | - | - | - | - | - | 1.73 | 1.36 | 2.35 |

Note: original unit cost data are derived from Zhu et al. (2022)15.

Table S10 Comparison of the projected residential electricity energy mix in this study with GEIDCO and BCG projections.

|  | **This study**  Projected urban-rural residential electricity consumption in 2050 | | | | **GEIDCO**  Projected urban-rural residential electricity consumption in 2050 (converted) | **BCG**  Projected urban-rural residential electricity consumption in 2050 (converted) |
| --- | --- | --- | --- | --- | --- | --- |
| Unit: TWh | BAU | LECI | LEF | ALL | - | - |
| Total | 1790 | 1492 | 1686 | 1457 | 3217 | 2565 |
| Thermal power | 1210 | 987 | 1063 | 932 | 690 | 577 |
| Biomass energy | 32 | 26 | 28 | 24 | 161 | 41 |
| Hydro power | 329 | 300 | 386 | 332 | 564 | 400 |
| Nuclear power | 107 | 77 | 106 | 74 | 305 | 287 |
| Wind power | 90 | 82 | 82 | 76 | 758 | 667 |
| Solar power | 53 | 46 | 48 | 43 | 739 | 593 |

Note: GEIDCO is projection from the Global Energy Interconnection Development and Cooperation Organization, BCG is projection from the Boston Consulting Group.

Table S11 Full names and abbreviations of China's provinces

| **Province** | **Abbreviation** |  | **Province** | **Abbreviation** |
| --- | --- | --- | --- | --- |
| Beijing | BJ |  | Hubei | HUB |
| Tianjin | TJ |  | Hunan | HUN |
| Hebei | HEB |  | Guangdong | GD |
| Shanxi | SX |  | Guangxi | GX |
| Inner Mongolia | NMG |  | Hainan | HN |
| Liaoning | LN |  | Chongqing | CQ |
| Jilin | JL |  | Sichuan | SC |
| Heilongjiang | HLJ |  | Guizhou | GZ |
| Shanghai | SH |  | Yunnan | YN |
| Jiangsu | JS |  | Tibet | XZ |
| Zhejiang | ZJ |  | Shanxi | SAX |
| Anhui | AH |  | Gansu | GS |
| Fujian | FJ |  | Qinghai | QH |
| Jiangxi | JX |  | Ningxia | NX |
| Shandong | SD |  | Xinjiang | XJ |
| Henan | HEN |  |  |  |

**References**

1. China Statistics Press. China Energy Statistical Yearbook 2021. (2021).

2. State Administration for State Organ Affairs. Statistical system for energy resource consumption in public institutions. https://ecpi.ggj.gov.cn/zlxz/201707/t20170728_40347.htm. (2017).

3. Yueyang Statistics Bureau. Reference coefficients for converting various energy sources to standard coal. https://tjj.yueyang.gov.cn/22771/22774/content_1983338.html. (2022).

4. International Renewable Energy Agency. Statistical Profiles. https: // www. irena. org. (2022).

5. IPCC, 2006 IPCC Guidelines for National Greenhouse Gas Inventories, Prepared by the National Greenhouse Gas Inventories Programme, Eggleston H.S., Buendia L., Miwa K., Ngara T. and Tanabe K. (eds). (IGES, 2006). https://www.ipcc-nggip.iges.or.jp/public/2006gl/index.html.

6. National Development and Reform Commission. Guidelines for the preparation of provincial greenhouse gas inventory (Trial). http://www.ncsc.org.cn/SY/tjkhybg/202003/t20200319_769763.shtml. (2011).

7. National Development and Reform Commission. Research on China’s greenhouse gas inventory: 2005. (China Environmental Science Press, 2014).

8. National Development and Reform Commission. Accounting methods and reporting guidelines for greenhouse gas emissions of Chinese power generation enterprises (Trial). https://www.gov.cn/gzdt/att/att/site1/20131104/001e3741a2cc13e13f1101.pdf. (2013).

9. IPCC. Summary for Policymakers. In: Climate Change 2021: The Physical Science Basis. Contribution of Working Group I to the Sixth Assessment Report of the Intergovernmental Panel on Climate Change. (Cambridge University Press, 2021)..

10. China Electricity Council. Compilation of Electricity Industry statistics 2020. http://60.16.24.131/CSYDMirror/trade/Yearbook/Single/N2022060182?z=Z025. (2021).

11. Hao, J., Tian, H. & Lu, Y. Emission Inventories of NOx from Commercial Energy Consumption in China, 1995−1998. *Environ. Sci. Technol.* **36**, 552-560 (2002).

12. Chen, X., Wang, G., Guo, X. & Fu, J. An Analysis Based on SD Model for Energy-Related CO 2 Mitigation in the Chinese Household Sector. *Energies* **9** (2016).

13. Xing, R., Hanaoka, T. & Masui, T. Deep decarbonization pathways in the building sector: China’s NDC and the Paris agreement. *Environ. Res. Lett.* **16**, 44054 (2021).

14. Zhang, S. et al. Pathway for decarbonizing residential building operations in the US and China beyond the mid-century. *Appl. Energy* **342**, 121164 (2023).

15. Zhu, Z. et al. Integrated livestock sector nitrogen pollution abatement measures could generate net benefits for human and ecosystem health in China. *Nat. Food* **3**, 161-168 (2022).
